# Supplementary material
Source: ML conference proceedings conference paper supplement (https://openreview.net/forum?id=5aetS3xqm3)
Supplement: supplementary_material [file attachment]

---

# Appendix for VATT: Transformers for Multimodal Self-Supervised Learning from Raw Video, Audio and Text

---

Anonymous Author(s)

Affiliation

Address

email

1 Appendix contains more detailed explanations about datasets (A) and the experimental setup (B)  
2 for both pre-training and downstream tasks. We also cover linear evaluation results compared to  
3 state-of-the-art (C) and an ablation study on the input parameters (D).

## 4 A Datasets

### 5 A.1 Pre-training

6 Following [1, 13], we use HowTo100M [12] and AudioSet [7] to pre-train VATT. The former contains  
7 1.2M unique videos, each providing multiple clips with audio and narration scripts resulting in 136M  
8 video-audio-text triplets in total. The narration scripts are extracted from speech audio using an  
9 off-the-shelf ASR. We use a subset of HowTo100M to comply with Youtube’s policies, which results  
10 in having almost 1M unique videos and less than 100M clips. AudioSet consists of 10-second clips  
11 sampled from two million videos from YouTube. The dataset contains a variety of audio events  
12 with their corresponding video without any narration, so we do not have any text input from this  
13 dataset. We do not use any labels from the datasets. We uniformly sample clips from these datasets; a  
14 mini-batch in the pre-training contains samples from both datasets. In order to fill in the empty text  
15 in AudioSet, we feed a sequence of zeros to the text Transformer and exclude those samples from the  
16 MIL-NCE loss.

### 17 A.2 Downstream

18 We evaluate the pre-trained VATT on a set of diverse, representative downstream tasks to test different  
19 aspects of the learned representations.

20 **Video action recognition:** We evaluate the visual representations on UCF101 [21] (101 classes,  
21 13,320 videos), HMDB51 [11] (51 classes, 6,766 videos), Kinetics-400 [3] (400 classes, 234,584  
22 videos), Kinetics-600 [4] (600 classes, 366,016 videos), and Moments in Time [15] (339 classes,  
23 791,297 videos). Since UCF101 and HMDB51 are small datasets compared to the size of our model,  
24 we freeze the vision backbone and use its outputs to train a linear classifier. We use the split #1 results  
25 of the two datasets as a reference in our design exploration. For Kinetics-400, Kinetics-600, and  
26 Moments in Time, we fine-tune our vision backbone initialized from the pre-trained checkpoint.

27 **Audio event classification:** We use ESC50 [17] (50 classes, 2000 audio clips) and AudioSet [7]  
28 (527 classes, ~2M audio clips) to evaluate our audio Transformer on audio event classification. We  
29 use ESC50 to train a linear classifier on top of the frozen audio Transformer. We use the split #1  
30 results of this dataset as a reference in our design exploration. We also use AudioSet to fine-tune our  
31 audio backbone initialized from the pre-trained checkpoint.

**Zero-shot video retrieval:** We evaluate the quality of our video-text common space representations by *zero-shot* text-to-video retrieval on two of the most established datasets in this area: YouCook2 [24] and MSR-VTT [22] with 3.1k and 1k video-text pairs, respectively. We follow the same evaluation pipeline described in [1] and report the Recall at 10 (R@10).

**Image classification:** Although there exists a domain gap between images and the video datasets used for pre-training VATT, we test the learned vision Transformer in the image domain. We fine-tune the last checkpoint of the vision Transformer on ImageNet [5] with no modification to our architecture or the tokenization pipeline. We will elaborate on this in the sequel.

## B Experimental Setup

### B.1 Inputs

During pre-training, we sample 32 frames at 10 fps for both pre-training datasets. For these frames, we randomly crop a temporally consistent spatial region whose relative area is in the range of [0.08, 1] and its aspect ratio in [0.5, 2]. These crops are then resized to  $224 \times 224$ , followed by a horizontal flip and color augmentation. The color augmentation follows [1] and randomizes brightness (max delta = 32/255), saturation (max delta = 0.4), contrast (max delta=0.4), and hue (max delta=0.2). We clip values to ensure the RGB is in [0, 1]. The audio waveforms are sampled in sync with the video frames at 48kHz. Both video and audio inputs are normalized between [-1, 1] for numerical stability. We use patch sizes of  $4 \times 16 \times 16$  and 128 for video and raw waveform tokenization, respectively. We use one-hot vectors to encode text sequences with the vocabulary size of  $2^{16}$ , which is the same as word2vec [14]. The resulting sequence retains a maximum of 16 words by either clipping or padding. We use DropToken with a drop rate of 50% during pre-training. For video fine-tuning and evaluation, 32 frames with a temporal stride of 2 are sampled at 25 fps (2.56 seconds) with a crop size of  $320 \times 320$  (with similar video augmentation during pre-training), and we do not drop any tokens. We do not change the input size for audio and text during evaluation.

### B.2 Network setup in VATT

We use the same Transformer architecture described in the main paper with various sizes shown in Table 1. We use the Medium model for our modality-agnostic variant (VATT-MA). For the experiments with modality-specific Transformers, we use the Small and Base models for the text and audio modalities, respectively, while varying the model sizes for the video modality. This results in 3 variants for the modality-specific video-audio-text backbones: Base-Base-Small (BBS), Medium-Base-Small (MBS), and Large-Base-Small (LBS).

| Model  | Layers | Hidden Size | MLP Size | Heads | Params  |
|--------|--------|-------------|----------|-------|---------|
| Small  | 6      | 512         | 2048     | 8     | 20.9 M  |
| Base   | 12     | 768         | 3072     | 12    | 87.9 M  |
| Medium | 12     | 1024        | 4096     | 16    | 155.0 M |
| Large  | 24     | 1024        | 4096     | 16    | 306.1 M |

Table 1: Details of the Transformer architectures in VATT.

### B.3 Projection heads and contrastive losses

We use  $d_{va} = 512$  and  $d_{vt} = 256$  for the projection to the common spaces  $\mathcal{S}_{va}$  and  $\mathcal{S}_{vt}$ , respectively. We normalize the vectors before calculating the NCE and MIL-NCE objectives and use the temperature of  $\tau = 0.07$  and the weight of  $\lambda = 1$  in the loss defined in the paper. We choose these values following the previously established practice [1]; we may achieve better results by varying these hyper-parameters.

## 69 B.4 Pre-training setup

70 We pre-train VATT from scratch using Adam [8] with an initial learning rate of  $1e-4$ , 10k warmup  
71 steps, 500k steps in total, a batch size of 2048, and a quarter-period cosine schedule to anneal the  
72 learning rate from  $1e-4$  to  $5e-5$ . In the exploration experiments, we use a batch size of 512 while  
73 keeping the rest of the training parameters the same. Our pipeline is implemented in Tensorflow  
74 (v2.4), and our models are trained for 3 days using 256 TPUs (v3).

## 75 B.5 Video fine-tuning setup

76 For video action recognition, we use the SGD with a momentum of 0.9 and an initial learning rate of  
77 0.005, 2.5k warmup steps, a batch size of 64, 100k steps in total, and a half-period cosine schedule  
78 to anneal the learning rate to 0. We use label smoothing with smoothing factor  $\alpha = 0.1$ . The video  
79 frame resolution is  $320 \times 320$ , which results in an increase in the number of positional encoding  
80 weights. This increase is due to the fact that, in the pre-train time, we have 8+14+14 positional  
81 encoding buckets, while 8+20+20 positional buckets are required to completely encode 320/16  
82 horizontal and 320/16 vertical locations in fine-tune. To generate the new positional embeddings, we  
83 create a new set of positional encoding buckets by bi-cubic interpolation from the original buckets.  
84 After this step, we fine-tune the entire network, including the positional encoding buckets, end-to-end.  
85 We tried fixed positional embeddings (solely based on interpolation for the missing locations) and did  
86 not observe significant improvements. We uniformly sample 4 clips to cover the entire 10 seconds  
87 of the video and apply a standard 3-crop evaluation following [6]. We average the logits across the  
88 resulting 12 views before having the final class predictions.

## 89 B.6 Audio fine-tuning setup

90 For audio event classification, we use the SGD with a momentum of 0.9, an initial learning rate of  
91 0.2, 5k warmup steps, a batch size of 1024, 50k steps in total, and a half-period cosine schedule to  
92 anneal the learning rate to 0. We observe that increasing the effective receptive field improves the  
93 overall performance. We suggest that this might be due to the fact that the AudioSet annotations  
94 are multi-label and each event might occur in different temporal positions. Hence, we employ the  
95 duration of 6.4s with 24kHz sampling rate (153.6k total input samples). Similar to [9], we use  
96 mixup [23] on input-label  $(x-y)$  pairs in a mini-batch as below:

$$x = \alpha x_1 + (1 - \alpha)x_2, \quad y = \alpha y_1 + (1 - \alpha)y_2,$$

97 where the input-label pairs are randomly sampled from a mini-batch, and the mixing rate  $\alpha$  is sampled  
98 from a Beta(5, 5) distribution. We also perform data balancing by penalizing the loss value of a  
99 sample with the inverse of the per-batch number of repetitive labels it carries. This is crucial for  
100 avoiding over-fitting since AudioSet has a long-tailed distribution, and a few dominant classes may  
101 disrupt the training [9].

## 102 B.7 Image fine-tuning setup

103 We finetune the pre-trained VATT on ImageNet for 50 epochs with  $384 \times 384$  input resolution, 512  
104 batch size, SGD with momentum of 0.9, cosine learning rate decay with an initial learning rate of  
105  $8e-2$ , and label smoothing of 0.1. No weight decay is used.

## 106 B.8 Linear evaluation setup

107 We use a linear classifier with fixed backbones across all datasets and tasks. We observe that using  
108 matrix factorization on the classifier weight [19] leads to a more stable result across experiments. More  
109 specifically, we use a factorized weight  $C = UV \in \mathbb{R}^{d \times c}$ , where  $U \in \mathbb{R}^{d \times n}$  and  $V \in \mathbb{R}^{n \times c}$  are  
110 learnable weights. During training this classifier, we randomly choose a subset of the  $n$  components  
111 in  $U$  and  $V$ , hence leading to a low-rank classifier weight,  $C$ . The classifier weight,  $C$ , is trained  
112 using the Adam optimizer with a learning rate of  $5e-4$ , a batch size of 64, a total of 50k training steps,  
113 and a sampling rate of 10% on its  $n = 128$  components.

## 114 B.9 Zero-shot retrieval setup

115 For zero-shot text-to-video retrieval, we use the 1k split of MSR-VTT and the entire test split of  
 116 YouCook2 as the pool for retrieval. We use  $224 \times 224$  central crops for 32 frames with a temporal  
 117 stride of 2 sampled at 25 fps. Since each input clip covers 2.56 seconds, and the full clip length is 10  
 118 seconds, we average the embeddings over 4 uniformly sampled clips before calculating the similarity  
 119 with a text query’s embedding. We  $\ell_2$ -normalize each vector to assure that a dot product results in the  
 120 cosine similarity.

## 121 C Linear evaluation on frozen VATT

122 We also test VATT’s ability to generalize to other datasets when the entire backbone is frozen. In  
 123 this setting, we focus on the video and audio modalities and train a linear classifier on the outputs  
 124 of the frozen backbones. In addition to the low-rank classifier (LRC) described in Section B, we  
 125 also report the results of a SVM classifier following the same pipeline as [1]. Table 2 shows the  
 126 performance of our model on three datasets. We observe that VATT does not outperform the best  
 127 CNN counterparts in [1], and achieves comparable numbers to other baselines. This could suggest  
 128 that VATT’s backbones learn less-linearly-separable feature, especially given that the contrastive  
 129 estimation head includes non-linear projections.

| METHOD               | UCF101      | HMDB51      | ESC50       |
|----------------------|-------------|-------------|-------------|
| MIL-NCE [13]         | 83.4        | 54.8        | -           |
| AVTS [10]            | -           | -           | 82.3        |
| XDC [2]              | -           | -           | 84.8        |
| ELo [18]             | -           | 64.5        | -           |
| AVID [20]            | -           | -           | <b>89.2</b> |
| GDT [16]             | -           | -           | 88.5        |
| MMV [1]              | <b>91.8</b> | <b>67.1</b> | 88.9        |
| VATT-Medium + SVM    | 89.2        | 63.3        | 82.5        |
| VATT-Medium + LRC    | 89.6        | 65.2        | 84.7        |
| VATT-MA-Medium + LRC | 84.4        | 63.1        | 81.2        |

Table 2: Linear evaluation results for video action recognition on UCF101 and HMDB51 and audio event classification on ESC50. MA refers to the modality-agnostic backbone.

## 130 D Ablation study on input parameters

131 Since VATT takes raw multimodal signals as inputs, the choice of input size and how they are patched  
 132 has a significant impact on the final performance. First, we alter the frame crop size and the number  
 133 of sampled frames from each video clip while keeping the patch size fixed to  $5 \times 16 \times 16$ . Table 3  
 134 shows that using a small frame crop size and a larger number of frames hurts the video-related results,  
 135 but it does not significantly change the audio classification numbers.

| Frame Size                 | Patch Size              | UCF         | HMDB        | YC2          | MSRVTT       | ESC       |
|----------------------------|-------------------------|-------------|-------------|--------------|--------------|-----------|
| $32 \times 224 \times 224$ | $4 \times 16 \times 16$ | <b>87.8</b> | <b>67.7</b> | <b>27.53</b> | <b>17.99</b> | <b>87</b> |
| $32 \times 200 \times 200$ | $5 \times 16 \times 16$ | 87.16       | 67.08       | 23.98        | 17.84        | 86.25     |
| $32 \times 224 \times 224$ | $5 \times 16 \times 16$ | 87.74       | 67.6        | 27.47        | 17.96        | <b>87</b> |
| $64 \times 224 \times 224$ | $5 \times 16 \times 16$ | 86.57       | 63.09       | 18.52        | 12.5         | 86.25     |
| $32 \times 224 \times 224$ | $8 \times 16 \times 16$ | 86.52       | 65.64       | 23.43        | 16.14        | 84        |
| $32 \times 224 \times 224$ | $8 \times 32 \times 32$ | 82.68       | 60.73       | 15.27        | 13.79        | 87        |

Table 3: Effect of video frame and patch size on downstream results.

136 Then, we keep the best frame size ( $32 \times 224 \times 224$ ) and vary the video patch size. We find going  
 137 beyond  $4 \times 16 \times 16$  along either the time or spatial dimensions is not helpful. We avoid patches that  
 138 are smaller than  $4 \times 16 \times 16$  because of the significantly increased wall clock time in experiments.

Finally, we compare different audio patch sizes and perform an experiment using spectrograms, as opposed to the raw waveforms, as audio input. The goal is to see how the raw waveforms compare to the handcrafted spectrograms. We use the MEL spectrogram with 80 bins, the STFT length of 42 ms, and the STFT step of 21 ms following a similar setup in [1]. Tables 4 summarize the results, in which we observe that the patch size of 128 gives rise to the best waveform-based results, and using spectrogram does not lead to any conclusive improvement. The experiment with the spectrograms demonstrates that VATT is able to learn semantic representations from raw audios. To the best of our knowledge, this is the first time that raw audio waveforms are used for multimodal self-supervised learning.

| Input       | Patch Size    | UCF          | HMDB         | YC2          | MSRVTT       | ESC          |
|-------------|---------------|--------------|--------------|--------------|--------------|--------------|
| Waveform    | 128           | <b>88.14</b> | <b>68.13</b> | 25.72        | <b>17.31</b> | <b>87.75</b> |
| Waveform    | 256           | 87.74        | 66.1         | 24.19        | 16.55        | 83.75        |
| Waveform    | 512           | 87.21        | 67.34        | <b>26.11</b> | 16.91        | 82.5         |
| Waveform    | 1024          | 86.41        | 66.36        | 24.46        | 16.38        | 82.5         |
| Spectrogram | $16 \times 5$ | <b>88.3</b>  | 67.52        | <b>26.62</b> | 16.86        | <b>88</b>    |

Table 4: Effect of the audio input type and patch size on downstream results.

## References

- [1] Jean-Baptiste Alayrac, Adrià Recasens, Rosalia Schneider, Relja Arandjelović, Jason Ramapuram, Jeffrey De Fauw, Lucas Smaira, Sander Dieleman, and Andrew Zisserman. Self-supervised multimodal versatile networks. In *NeurIPS*, 2020. 1, 2, 4, 5
- [2] Humam Alwassel, Dhruv Mahajan, Bruno Korbar, Lorenzo Torresani, Bernard Ghanem, and Du Tran. Self-supervised learning by cross-modal audio-video clustering. *arXiv preprint arXiv:1911.12667*, 2019. 4
- [3] Joao Carreira and Andrew Zisserman. Quo vadis, action recognition? a new model and the kinetics dataset. In *CVPR*, 2017. 1
- [4] Joao Carreira, Eric Noland, Andras Banki-Horvath, Chloe Hillier, and Andrew Zisserman. A short note about kinetics-600. *arXiv preprint arXiv:1808.01340*, 2018. 1
- [5] Jia Deng, Wei Dong, Richard Socher, Li-Jia Li, Kai Li, and Li Fei-Fei. Imagenet: A large-scale hierarchical image database. In *CVPR*, 2009. 2
- [6] Christoph Feichtenhofer, Haoqi Fan, Jitendra Malik, and Kaiming He. Slowfast networks for video recognition. In *ICCV*, 2019. 3
- [7] Jort F. Gemmeke, Daniel P. W. Ellis, Dylan Freedman, Aren Jansen, Wade Lawrence, R. Channing Moore, Manoj Plakal, and Marvin Ritter. Audio set: An ontology and human-labeled dataset for audio events. In *ICASSP*, 2017. 1
- [8] Diederik P Kingma and Jimmy Ba. Adam: A method for stochastic optimization. *arXiv preprint arXiv:1412.6980*, 2014. 3
- [9] Qiuqiang Kong, Yin Cao, Turab Iqbal, Yuxuan Wang, Wenwu Wang, and Mark D Plumbley. Panns: Large-scale pretrained audio neural networks for audio pattern recognition. *TASLP*, 2020. 3
- [10] Bruno Korbar, Du Tran, and Lorenzo Torresani. Cooperative learning of audio and video models from self-supervised synchronization. *NeurIPS*, 2018. 4
- [11] H. Kuehne, H. Jhuang, E. Garrote, T. Poggio, and T. Serre. HMDB: a large video database for human motion recognition. In *ICCV*, 2011. 1
- [12] Antoine Miech, Dimitri Zhukov, Jean-Baptiste Alayrac, Makarand Tapaswi, Ivan Laptev, and Josef Sivic. Howto100m: Learning a text-video embedding by watching hundred million narrated video clips. In *ICCV*, 2019. 1

- 178 [13] Antoine Miech, Jean-Baptiste Alayrac, Lucas Smaira, Ivan Laptev, Josef Sivic, and Andrew  
179 Zisserman. End-to-end learning of visual representations from uncurated instructional videos.  
180 In *CVPR*, 2020. 1, 4
- 181 [14] Tomas Mikolov, Kai Chen, Greg Corrado, and Jeffrey Dean. Efficient estimation of word  
182 representations in vector space. *arXiv preprint arXiv:1301.3781*, 2013. 2
- 183 [15] Mathew Monfort, Alex Andonian, Bolei Zhou, Kandan Ramakrishnan, Sarah Adel Bargal, Tom  
184 Yan, Lisa Brown, Quanfu Fan, Dan Gutfreund, Carl Vondrick, et al. Moments in time dataset:  
185 one million videos for event understanding. *TPAMI*, 2019. 1
- 186 [16] Mandela Patrick, Yuki M Asano, Polina Kuznetsova, Ruth Fong, João F Henriques, Geoffrey  
187 Zweig, and Andrea Vedaldi. Multi-modal self-supervision from generalized data transformations.  
188 *arXiv preprint arXiv:2003.04298*, 2020. 4
- 189 [17] Karol J. Piczak. ESC: Dataset for Environmental Sound Classification. In *ACM MM*, 2015. 1
- 190 [18] AJ Piergiovanni, Anelia Angelova, and Michael S Ryoo. Evolving losses for unsupervised  
191 video representation learning. In *CVPR*, 2020. 4
- 192 [19] Steffen Rendle. Factorization machines. In *ICDM*, 2010. 3
- 193 [20] Laura Smith, Nikita Dhawan, Marvin Zhang, Pieter Abbeel, and Sergey Levine. Avid: Learning  
194 multi-stage tasks via pixel-level translation of human videos. *arXiv preprint arXiv:1912.04443*,  
195 2019. 4
- 196 [21] Khurram Soomro, Amir Roshan Zamir, and Mubarak Shah. Ucf101: A dataset of 101 human  
197 actions classes from videos in the wild. *arXiv preprint arXiv:1212.0402*, 2012. 1
- 198 [22] Jun Xu, Tao Mei, Ting Yao, and Yong Rui. Msr-vtt: A large video description dataset for  
199 bridging video and language. In *CVPR*, 2016. 2
- 200 [23] Hongyi Zhang, Moustapha Cisse, Yann N Dauphin, and David Lopez-Paz. mixup: Beyond  
201 empirical risk minimization. *arXiv preprint arXiv:1710.09412*, 2017. 3
- 202 [24] Luowei Zhou, Chenliang Xu, and Jason J Corso. Towards automatic learning of procedures  
203 from web instructional videos. In *AAAI*, 2018. 2
